# Supplementary material for: Plasma exosome-encapsulated microRNA-21 and microRNA-92a are promising biomarkers for the prediction of peritoneal recurrence in patients with gastric cancer
Source: PubMed Central journal article supplement — Oncol Lett. 2019 Sep 4;18(5):4467–80. doi: 10.3892/ol.2019.10807 (PMC6781766; doi:10.3892/ol.2019.10807), 2019-09-04
Supplement: Supplementary_Data.pdf [file Supplementary_Data.pdf]

Table SI. Background information of 6 patients with GC and 3 healthy volunteers subjected to the microRNA array analysis.

| Case no.              | Patients with GC |          |          |        |        |        | Healthy volunteers |        |        |
|-----------------------|------------------|----------|----------|--------|--------|--------|--------------------|--------|--------|
|                       | 1                | 2        | 3        | 4      | 5      | 6      | 1                  | 2      | 3      |
| Age, years/Race       | 63/Jpn           | 65/Jpn   | 70/Jpn   | 66/Jpn | 63/Jpn | 71/Jpn | 71/Jpn             | 62/Jpn | 63/Jpn |
| Sex                   | M                | M        | F        | M      | M      | F      | M                  | F      | M      |
| TNM stage             | II               | II       | II       | II     | II     | II     | -                  | -      | -      |
| Peritoneal recurrence | -                | -        | -        | +      | +      | +      | -                  | -      | -      |
| Tumor size, cm        | 3.0              | 4.4      | 6.0      | 5.0    | 6.0    | 4.0    | -                  | -      | -      |
| Differentiation       | Poorly           | tub1     | tub1     | tub1   | tub1   | Poorly | -                  | -      | -      |
| Depth of invasion     | T3               | T3       | T3       | T3     | T3     | T3     | -                  | -      | -      |
| Lymph node metastasis | n (-)            | n (-)    | n (-)    | n (-)  | n (-)  | n (-)  | -                  | -      | -      |
| Clinical outcome      | Survival         | Survival | Survival | Death  | Death  | Death  | -                  | -      | -      |

M, male; F, female; Jpn, Japanese; Poorly, poorly differentiated; Tub1, well differentiated; TNM, tumor-node-metastasis.

Table SII. Target genes of miR-21 and miR-92a according to miRBase and miRWalk databases.

| A, miR-21    |         |         |
|--------------|---------|---------|
| Target score | miRBase | miRWalk |
| 92           | PDCD4   | SREK1   |
| 92           | AKAP12  | PDCD4   |
| 92           | GID4    | WWP1    |
| 92           | HSD17B4 | MEGF9   |
| 92           | PDZD2   | TSHZ3   |
| 92           | CPEB3   | MGA     |
| 92           | CASK1N1 | MEIS1   |
| 92           | MAP3K1  | CLU     |
| 92           | UBE2D3  | SACMII  |
| 91           | NTF3    | RECK    |
| B, miR-92a   |         |         |
| Target score | miRBase | miRWalk |
| 92           | EP4     | FAM135A |
| 92           | DUSP5   | MCL1    |
| 92           | OSBPL5  | HDAC1   |
| 92           | CIC     | EP4     |
| 92           | PPP1R37 | ARID1B  |
| 92           | TOB2    | TAF8    |
| 92           | FHL2    | CBX6    |
| 91           | FMN2    | EZR     |
| 91           | PNISR   | LMNB2   |
| 91           | PDZD8   | HOXC8   |
